# Supplementary material
Source: HighWire-hosted journal article supplement (https://ard.bmj.com/content/83/8/1048)
Supplement: inline-supplementary-material-19 [file inline-supplementary-material-19.pdf]

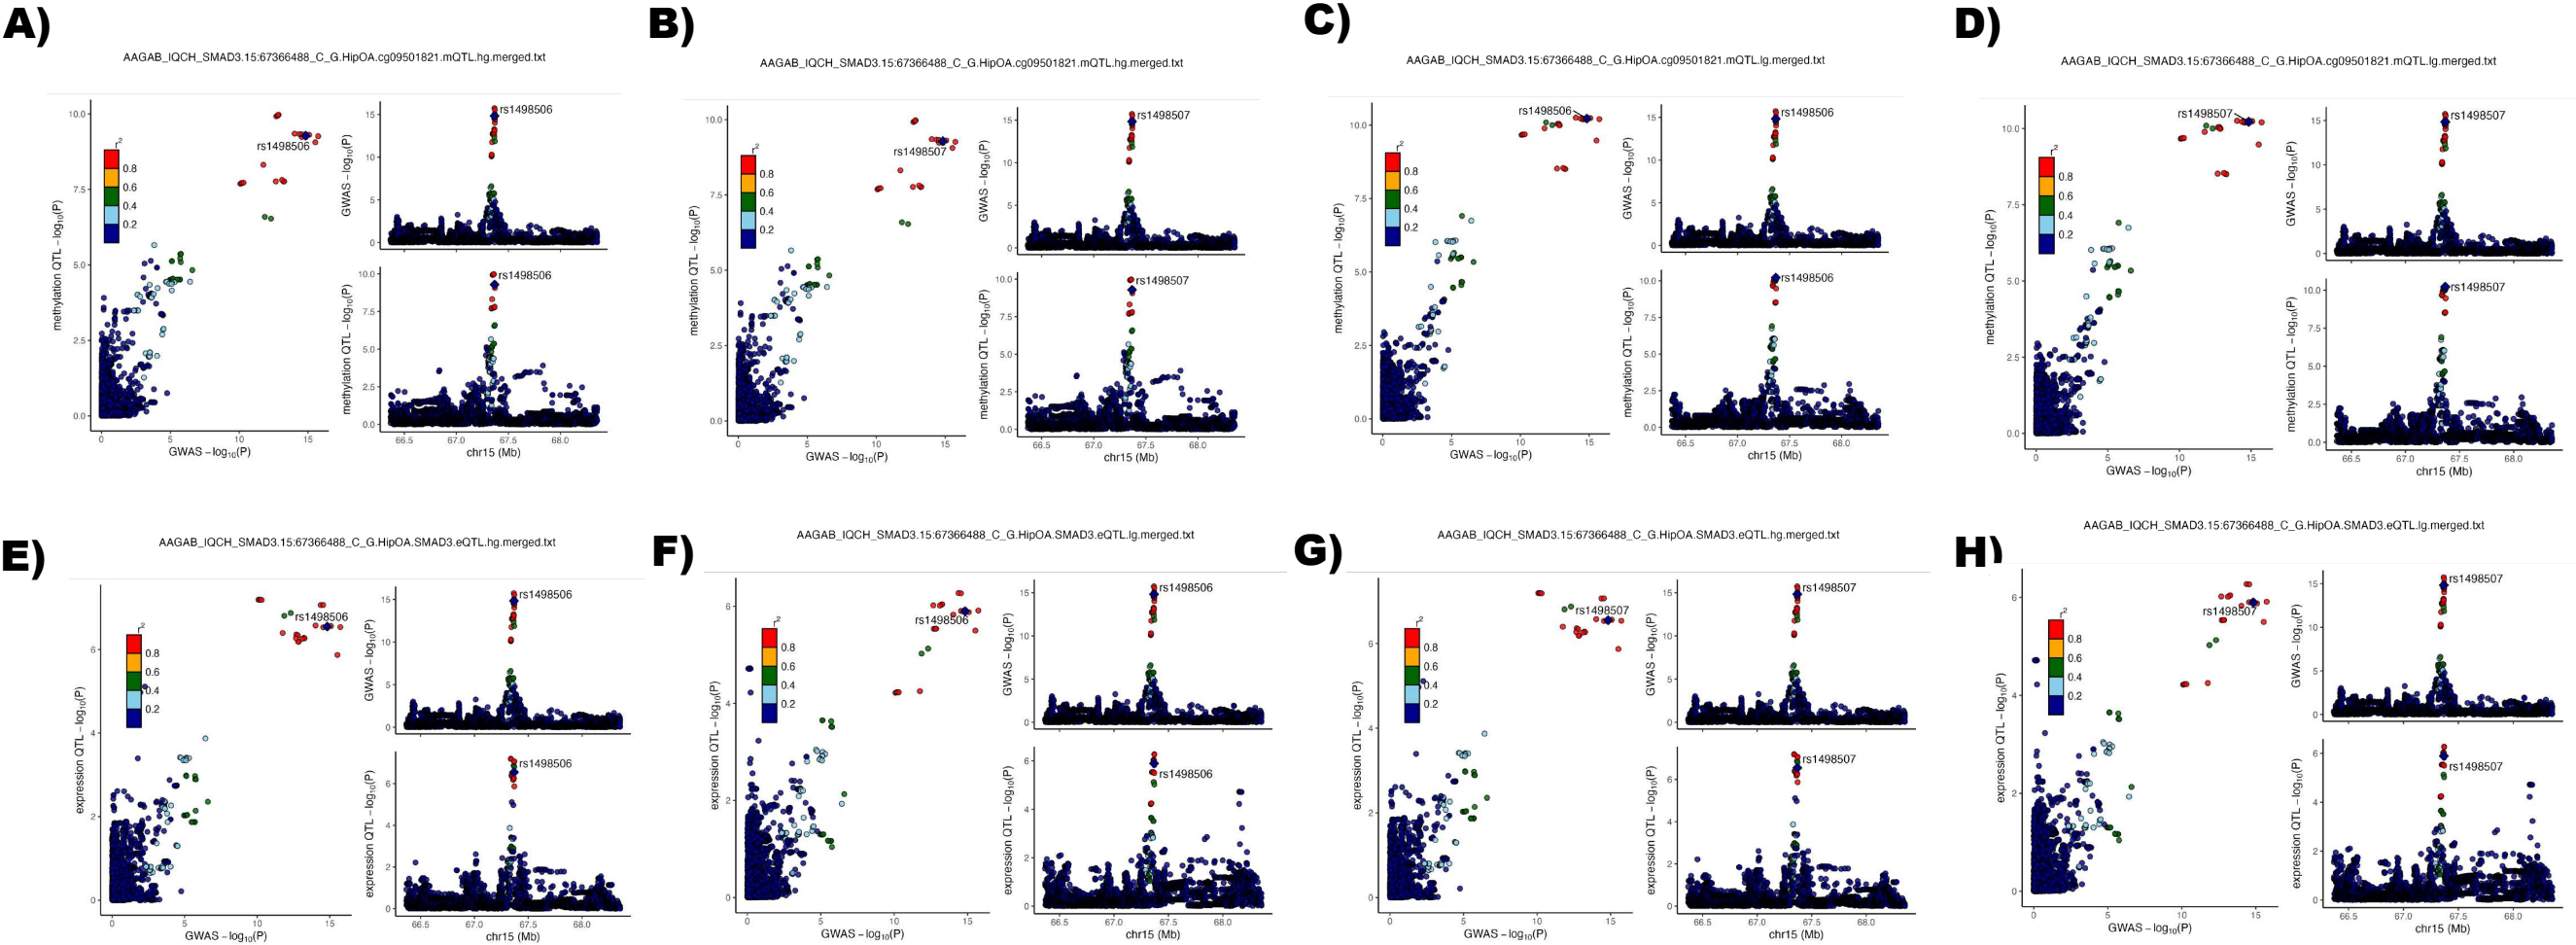

Supplemental Figure Regional association plots of variants linked with osteoarthritis lead variant rs12908498 on chromosome 15 and their respective methQTLs and eQTLs

**A)** AAGAB\_IQCH\_SMAD3.15/67366488\_C\_G.HipOA.cg09501821.mQTL.hg.merged.txt\_rs1498506  
Regional association plot with the enhancer variant rs1498506 highlighted for the lead phenotype (hip osteoarthritis) from Boer, Hatzikotoulas, Southam et al.<sup>3</sup> (top right) and the methylationQTL (mQTL) for cg09501821 in high-grade cartilage (hg)<sup>41</sup> (bottom right). Comparison of P values between the GWAS and methylation QTL are depicted on the left. Variants are annotated to the enhancer variant which is highlighted in purple. Linkage disequilibrium with the lead variant is depicted according to the colours in the legend.

**B)** AAGAB\_IQCH\_SMAD3.15/67366488\_C\_G.HipOA.cg09501821.mQTL.hg.merged.txt\_rs1498507  
Regional association plot with the enhancer variant rs1498507 highlighted for the lead phenotype (hip osteoarthritis) from Boer, Hatzikotoulas, Southam et al.<sup>3</sup> (top right) and the methylationQTL (mQTL) for cg09501821 in high-grade cartilage (hg)<sup>41</sup> (bottom right). Comparison of P values between the GWAS and methylation QTL are depicted on the left. Variants are annotated to the enhancer variant which is highlighted in purple. Linkage disequilibrium with the lead variant is depicted according to the colours in the legend.

**C)** AAGAB\_IQCH\_SMAD3.15/67366488\_C\_G.HipOA.cg09501821.mQTL.lg.merged.txt\_rs1498506  
Regional association plot with the enhancer variant rs1498506 highlighted for the lead phenotype (hip osteoarthritis) from Boer, Hatzikotoulas, Southam et al.<sup>3</sup> (top right) and the methylationQTL (mQTL) for cg09501821 in high-grade cartilage (hg)<sup>41</sup> (bottom right). Comparison of P values between the GWAS and methylation QTL are depicted on the left. Variants are annotated to the enhancer variant which is highlighted in purple. Linkage disequilibrium with the lead variant is depicted according to the colours in the legend.

**D)** AAGAB\_IQCH\_SMAD3.15/67366488\_C\_G.HipOA.cg09501821.mQTL.lg.merged.txt\_rs1498507  
Regional association plot with the enhancer variant rs1498507 highlighted for the lead phenotype (hip osteoarthritis) from Boer, Hatzikotoulas, Southam et al.<sup>3</sup> (top right) and the methylationQTL (mQTL) for cg09501821 in high-grade cartilage (hg)<sup>41</sup> (bottom right). Comparison of P values between the GWAS and methylation QTL are depicted on the left. Variants are annotated to the enhancer variant which is highlighted in purple. Linkage disequilibrium with the lead variant is depicted according to the colours in the legend.

**E)** AAGAB\_IQCH\_SMAD3.15/67366488\_C\_G.HipOA.SMAD3.eQTL.hg.merged.txt\_rs1498506  
Regional association plot with the enhancer variant rs1498506 highlighted for the lead phenotype (hip osteoarthritis) from Boer, Hatzikotoulas, Southam et al.<sup>3</sup> (top right) and the expressionQTL (eQTL) for SMAD3 in high-grade cartilage<sup>39</sup> (bottom right). Comparison of P values between the GWAS and expression QTL are depicted on the left. Variants are annotated to the enhancer variant which is highlighted in purple. Linkage disequilibrium with the lead variant is depicted according to the colours in the legend.

**F)** AAGAB\_IQCH\_SMAD3.15/67366488\_C\_G.HipOA.SMAD3.eQTL.hg.merged.txt\_rs1498507  
Regional association plot with the enhancer variant rs1498507 highlighted for the lead phenotype (hip osteoarthritis) from Boer, Hatzikotoulas, Southam et al.<sup>3</sup> (top right) and the expressionQTL (eQTL) for SMAD3 in high-grade cartilage<sup>39</sup> (bottom right). Comparison of P values between the GWAS and expression QTL are depicted on the left. Variants are annotated to the enhancer variant which is highlighted in purple. Linkage disequilibrium with the lead variant is depicted according to the colours in the legend.

**G)** AAGAB\_IQCH\_SMAD3.15/67366488\_C\_G.HipOA.SMAD3.eQTL.lg.merged.txt\_rs1498506  
Regional association plot with the enhancer variant rs1498506 highlighted for the lead phenotype (hip osteoarthritis) from Boer, Hatzikotoulas, Southam et al.<sup>3</sup> (top right) and the expressionQTL (eQTL) for SMAD3 in high-grade cartilage<sup>39</sup> (bottom right). Comparison of P values between the GWAS and expression QTL are depicted on the left. Variants are annotated to the enhancer variant which is highlighted in purple. Linkage disequilibrium with the lead variant is depicted according to the colours in the legend.

**H)** AAGAB\_IQCH\_SMAD3.15/67366488\_C\_G.HipOA.SMAD3.eQTL.lg.merged.txt\_rs1498507  
Regional association plot with the enhancer variant rs1498507 highlighted for the lead phenotype (hip osteoarthritis) from Boer, Hatzikotoulas, Southam et al.<sup>3</sup> (top right) and the expressionQTL (eQTL) for SMAD3 in high-grade cartilage<sup>39</sup> (bottom right). Comparison of P values between the GWAS and expression QTL are depicted on the left. Variants are annotated to the enhancer variant which is highlighted in purple. Linkage disequilibrium with the lead variant is depicted according to the colours in the legend.
